# Supplementary material for: Rural protein insufficiency in a wildlife-depleted West African farm-forest landscape
Source: PubMed Central journal article supplement (PMC5728563; doi:10.1371/journal.pone.0188109), 2017-12-13
Supplement: pone.0188109.s001.pdf [file pone.0188109.s001.pdf]

S1 Table. Sales prices for animals consumed or sold in Wansampo.

| <b>Taxa</b>              | <b>US\$/animal ± SD</b> | <b>US\$/kg (dressed)</b> | <b>US\$/kg (protein)</b> | <b>N</b> |
|--------------------------|-------------------------|--------------------------|--------------------------|----------|
| <b>Bushmeat mammals</b>  |                         |                          |                          |          |
| African civet            | 21.08±5.96              | 5.85                     | 21.29                    | 2        |
| Brush-tailed porcupine   | 7.39±2.34               | 4.40                     | 15.99                    | 17       |
| Pel's anomalure          | 3.22±0.6                | 3.35                     | 12.18                    | 19       |
| Common cusimanse         | 2.11±0.42               | 2.70                     | 9.83                     | 3        |
| Giant pouched rat        | 1.65±0.46               | 2.50                     | 9.09                     | 255      |
| Giant squirrel           | 1.31±0.54               | 2.83                     | 10.28                    | 2        |
| Grasscutter              | 5.86±3.32               | 1.47                     | 5.34                     | 11       |
| Lesser spot-nosed monkey | 11.59±9.35              | 5.85                     | 21.29                    | 4        |
| Maxwell's duiker         | 25.29±4.62              | 5.27                     | 19.16                    | 6        |
| Slender mongoose         | 2.11±0.42               | 5.85                     | 21.29                    | 3        |
| Bosman's potto           | 2.25±1.06               | 3.12                     | 11.35                    | 6        |
| Royal antelope           | 6.43±3.22               | 4.76                     | 17.31                    | 4        |
| Squirrel                 | 0.98±0.49               | 5.47                     | 19.89                    | 25       |
| Tree hyrax               | 4.04±1.48               | 2.24                     | 8.16                     | 31       |
| Tree pangolin            | 3.71±1.14               | 2.58                     | 9.38                     | 42       |
|                          |                         |                          |                          |          |
| <b>Bushmeat-other</b>    |                         |                          |                          |          |
| Ahanta francolin         | 1.21±0.78               | 4.20                     | 20.98                    | 3        |
| Crab                     | 0.07±0.03               | 1.44                     | 7.39                     | 42       |
| Crayfish                 | 0.11±0.09               | 1.25                     | 6.40                     | 3        |
| Monitor lizard           | 4.07±2.23               | 1.62                     | 5.88                     | 6        |
| Snail                    | 0.24±0.26               | 2.96                     | 29.63                    | 71       |
| Tortoise                 | 1.26±0.61               | 2.63                     | 9.57                     | 72       |
|                          |                         |                          |                          |          |
| <b>Livestock</b>         |                         |                          |                          |          |
| Beef <sup>a</sup>        | N/a                     | 3.96                     | 22.02                    | 20       |
| Chicken <sup>b</sup>     | 5.11±1.17               | 7.09                     | 35.45                    | 27       |
| Goat <sup>b</sup>        | 24.85±10.13             | 3.19                     | 17.70                    | 25       |
| Pork <sup>a</sup>        | N/a                     | 2.99                     | 24.94                    | 15       |
| Sheep <sup>b</sup>       | 33.08±10.7              | 2.80                     | 16.46                    | 33       |
|                          |                         |                          |                          |          |
| <b>Fish</b>              |                         |                          |                          |          |
| Tilapia (dried)          | 0.24±0.18               | 4.76                     | 10.13                    | 26       |
| Herring (dried)          | 0.16±0.04               | 4.08                     | 8.68                     | 19       |
| Mudfish (dried)          | 0.18±0.12               | 8.43                     | 17.94                    | 12       |
| Fish (not dried)         | 0.49±0.11               | 2.06                     | 10.95                    | 11       |

|                            |     |      |       |   |
|----------------------------|-----|------|-------|---|
| Fish (tinned) <sup>c</sup> | N/a | 6.00 | 31.91 | 7 |
|----------------------------|-----|------|-------|---|

<sup>a</sup> based on market data in Sefwi Dwenasi and consumption data in Wansampo due to insufficient data

<sup>b</sup> based on livestock survey in Wansampo using mean value per adult animal

<sup>c</sup> refers to tinned sardines and tuna; conversion factors were estimated from price per kg data
