# Supplementary material for: Rural protein insufficiency in a wildlife-depleted West African farm-forest landscape
Source: PubMed Central journal article supplement (PMC5728563; doi:10.1371/journal.pone.0188109), 2017-12-13
Supplement: pone.0188109.s002.pdf [file pone.0188109.s002.pdf]

**S2 Table. Literature estimates of food crop protein content.**

| <b>Species</b>            | <b>% protein</b> | <b>Source</b> |
|---------------------------|------------------|---------------|
| <b>Low protein crops</b>  |                  |               |
| Cassava                   | 0.5              | [1]           |
|                           | 0.6              | [2]           |
|                           | 1.0              | [3]           |
|                           | 1.0              | [4]           |
|                           | 1.2              | [5]           |
|                           | 1.4              | [6]           |
|                           | 1.5              | [7]           |
|                           | 4.0              | [8]           |
| Plantain                  | 0.9              | [3]           |
|                           | 1.1              | [2]           |
|                           | 1.3              | [6]           |
|                           | 1.7              | [9]           |
|                           | 3.0 – 3.5        | [10]          |
| Yam                       | 1.5              | [6]           |
|                           | 1.5              | [2]           |
|                           | 2.0              | [3]           |
|                           | 2.0              | [1]           |
| Cocoyam                   | 3.0 – 5.5        | [11]          |
|                           | 10.4             | [12]          |
| Okra                      | 2.0              | [6]           |
|                           | 2.8              | [2]           |
|                           |                  |               |
| <b>High protein crops</b> |                  |               |
| Groundnut                 | 22.6             | [6]           |
|                           | 22.8             | [2]           |
|                           | 23.0             | [13]          |
|                           | 25.8             | [2]           |
|                           | 28.0             | [14]          |
| Beans                     | 22.0             | [13]          |

## References for S2 Table

1. Bradbury JH, Holloway WD. Chemistry of Tropical Root Crops. Canberra: Australian Centre for International Agricultural Research; 1988.
2. Food Standards Agency. McCance & Widdowson's the Composition of Foods Integrated Dataset [Internet]. London: HMSO; 2002. Available: [http://tna.europarchive.org/20110116113217/http://www.food.gov.uk/multimedia/spreadsheets/c\\_ofids.xls](http://tna.europarchive.org/20110116113217/http://www.food.gov.uk/multimedia/spreadsheets/c_ofids.xls)
3. FAO. Roots, tubers, plantains and bananas in human nutrition. Rome: FAO; 1990 p. 198. Report No.: 24.
4. Gomez G, Valdivieso M. The effect of variety and plant age on cyanide content, chemical composition and quality of cassava roots. *Nutr Rep Int.* 1983;27: 595–865.
5. Ayankunbi MA, Keshinro OO, Egele P. Effect of methods of preparation on the nutrient composition of some cassava products-Garri (eba), "Lafun" and "Fufu." *Food Chem.* 1991;41: 349–354. doi:10.1016/0308-8146(91)90059-W
6. Saxholt E, Christensen AT, Moller A, Hartkopp HB, Hess Ygil K, Hels OH. Danish Food Composition Databank, revision 7 [Internet]. Copenhagen: Department of Nutrition, National Food Institute, Technical University of Denmark; 2008. Available: <http://www.foodcomp.dk/>
7. ITTA. Cassava in tropical Africa: a reference manual. Ibadan, Nigeria: IITA; 1990.
8. Ceballos H, Sanchez T, Chavez AL, Iglesias C, Debouck D, Mafla G, et al. Variation in crude protein content in cassava (*Manihot esculenta* Crantz) roots. *J Food Compos Anal.* 2006;19: 589–593. doi:10.1016/j.jfca.2005.11.001
9. Giami SY, Alu DA. Changes in composition and certain functional properties of ripening plantain (*Musa* spp., AAB group) pulp. *Food Chem.* 1994;50: 137–140. doi:10.1016/0308-8146(94)90110-4
10. Ketiku AO. Chemical composition of unripe (green) and ripe plantain (*Musa paradisiaca*). *J Sci Food Agric.* 1973;24: 703–707. doi:10.1002/jsfa.2740240610
11. Sefa-Dedeh S, Agyir-Sackey EK. Chemical composition and the effect of processing on oxalate content of cocoyam *Xanthosoma sagittifolium* and *Colocasia esculenta* cormels. *Food Chem.* 2004;85: 479–487. doi:10.1016/S0308-8146(02)00244-3
12. Hussain M, Norton G, Neale RJ. Composition and nutritive value of cormels of *Colocasia esculenta* (L.) Schott. *J Sci Food Agric.* 1984;35: 1112–1119. doi:10.1002/jsfa.2740351010
13. FAO. Agriculture, food and nutrition for Africa: a resource book for teachers of agriculture. Rome: FAO; 1997.
14. Lusas EW. Food uses of peanut protein. *J Am Oil Chem Soc.* 1979;53: 425–430.
