# Supplementary material for: Rural protein insufficiency in a wildlife-depleted West African farm-forest landscape
Source: PubMed Central journal article supplement (PMC5728563; doi:10.1371/journal.pone.0188109), 2017-12-13
Supplement: pone.0188109.s003.pdf [file pone.0188109.s003.pdf]

S3 Table. Results of GLMM assessing the effect of household size (AME) on protein consumption per household.

| <b>Model</b> | <b>Delta AIC</b> | <b>Akaike weight</b> |
|--------------|------------------|----------------------|
| ame          | 0                | 1.00                 |
| null         | 29.33            | <0.001               |
