# Supplementary material for: Rural protein insufficiency in a wildlife-depleted West African farm-forest landscape
Source: PubMed Central journal article supplement (PMC5728563; doi:10.1371/journal.pone.0188109), 2017-12-13
Supplement: pone.0188109.s004.pdf [file pone.0188109.s004.pdf]

S4 Table. Results of GLMM assessing the effect of household wealth (wealth), gender of the household head (gender) and seasonality (season) on household size (in AME).

| <b>Model</b> | <b>Delta AIC</b> | <b>Akaike weight</b> |
|--------------|------------------|----------------------|
| wealth       | 0                | 0.94                 |
| gender       | 6.03             | 0.04                 |
| null         | 9.73             | >0.01                |
| season       | 11.56            | >0.01                |
