# Supplementary material for: Rural protein insufficiency in a wildlife-depleted West African farm-forest landscape
Source: PubMed Central journal article supplement (PMC5728563; doi:10.1371/journal.pone.0188109), 2017-12-13
Supplement: pone.0188109.s005.pdf [file pone.0188109.s005.pdf]

S5 Table. Results of GLMM analysing the effect of participatory household wealth (wealth), gender of the household head (gender) and seasonality (season) on the contribution of plant protein within a household's total protein consumption (assuming 1% protein content of low-protein food crops). Mean consumption estimates per household per season were analysed (N=185).

| <b>Model</b>                | <b>Delta AIC</b> | <b>Akaike weight</b> |
|-----------------------------|------------------|----------------------|
| wealth+season               | 0                | 0.38                 |
| wealth+gender+season        | 0.8              | 0.26                 |
| wealth                      | 3.2              | 0.08                 |
| season+gender               | 3.8              | 0.06                 |
| wealth+gender*season        | 3.8              | 0.06                 |
| season                      | 3.9              | 0.05                 |
| wealth+gender               | 4.1              | 0.05                 |
| season*gender               | 6.8              | 0.01                 |
| gender                      | 7.0              | 0.01                 |
| null                        | 7.1              | 0.01                 |
| wealth*season               | 7.3              | 0.01                 |
| wealth*season+gender        | 8.0              | 0.01                 |
| wealth*season+gender*season | 10.6             | <0.01                |
