# Supplementary material for: Rural protein insufficiency in a wildlife-depleted West African farm-forest landscape
Source: PubMed Central journal article supplement (PMC5728563; doi:10.1371/journal.pone.0188109), 2017-12-13

S1 Fig. Effect of households size (AME) on household protein consumption (g) (GLMM results in S3 Table).

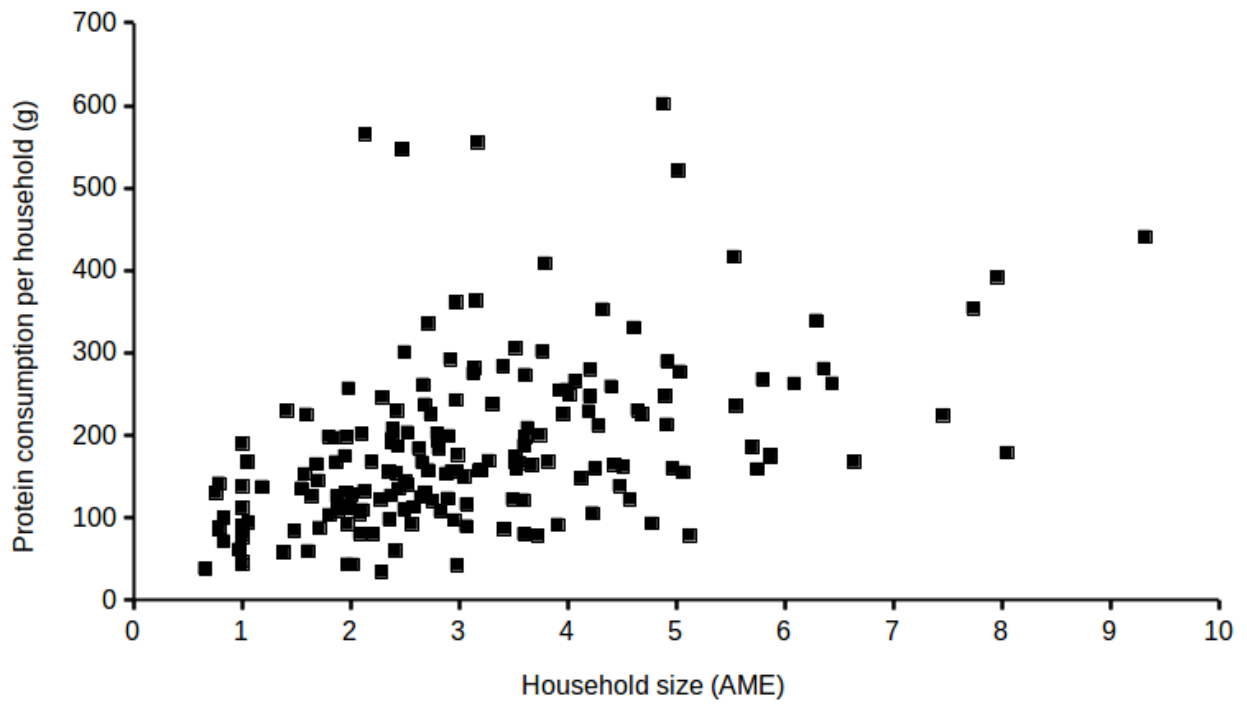

Supplement: pone.0188109.s007.pdf [file pone.0188109.s007.pdf]
