# Supplementary material for: Rural protein insufficiency in a wildlife-depleted West African farm-forest landscape
Source: PubMed Central journal article supplement (PMC5728563; doi:10.1371/journal.pone.0188109), 2017-12-13

S2 Fig. Effect of households wealth rank on household size (GLMM results in Table S3). Standard errors are shown.

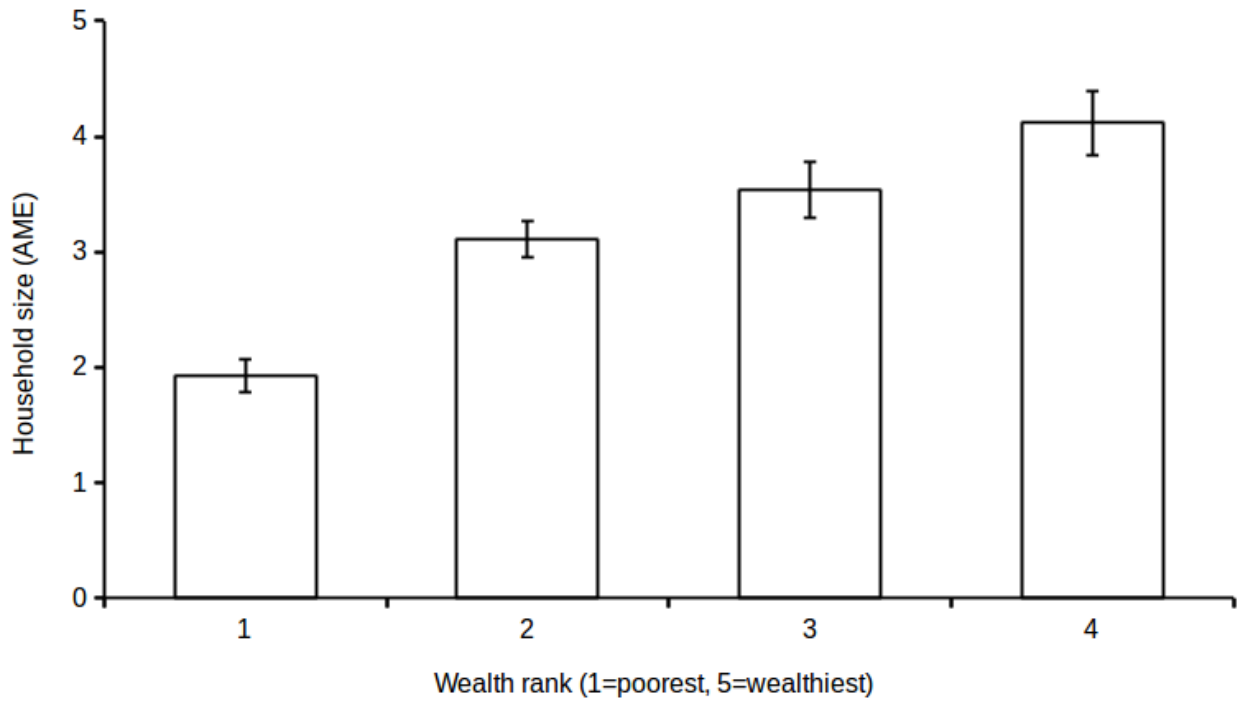

Supplement: pone.0188109.s008.pdf [file pone.0188109.s008.pdf]
