# Supplementary material for: Rural protein insufficiency in a wildlife-depleted West African farm-forest landscape
Source: PubMed Central journal article supplement (PMC5728563; doi:10.1371/journal.pone.0188109), 2017-12-13
Supplement: pone.0188109.s009.pdf [file pone.0188109.s009.pdf]

| T4 | INCOME (RawProd)  | #     | unit name | Size | Tot. | Total Sales | Origin | 24hr | Collector | Collected where |          | SoldBy | SoldTo | Location | Transp. | Market |
|----|-------------------|-------|-----------|------|------|-------------|--------|------|-----------|-----------------|----------|--------|--------|----------|---------|--------|
|    |                   |       |           |      |      |             |        |      |           | Location        | LandType |        |        |          |         |        |
|    | Sold product type | units |           |      | Kg   | price       | P/G/B  |      | PersID    |                 |          | PersID | PersID | sale     | cost    | cost   |
| 1  |                   |       |           |      |      |             |        |      |           |                 |          |        |        |          |         |        |
| 2  |                   |       |           |      |      |             |        |      |           |                 |          |        |        |          |         |        |
| 3  |                   |       |           |      |      |             |        |      |           |                 |          |        |        |          |         |        |

| T5 | GIFTS | Income | Expend | Food | Meal | Item | Work | Money | Plant | From | Recipient | # | unit name | Weight | Total Amount / | 24hr | Origin | Purpose % |        |       |      |           |
|----|-------|--------|--------|------|------|------|------|-------|-------|------|-----------|---|-----------|--------|----------------|------|--------|-----------|--------|-------|------|-----------|
|    |       |        |        |      |      |      |      |       |       |      |           |   |           |        |                |      |        | PersID    | PersID | units | (kg) | WSP price |
| 1  |       |        |        |      |      |      |      |       |       |      |           |   |           |        |                |      |        |           |        |       |      |           |
| 2  |       |        |        |      |      |      |      |       |       |      |           |   |           |        |                |      |        |           |        |       |      |           |
| 3  |       |        |        |      |      |      |      |       |       |      |           |   |           |        |                |      |        |           |        |       |      |           |
| 4  |       |        |        |      |      |      |      |       |       |      |           |   |           |        |                |      |        |           |        |       |      |           |
| 5  |       |        |        |      |      |      |      |       |       |      |           |   |           |        |                |      |        |           |        |       |      |           |
| 6  |       |        |        |      |      |      |      |       |       |      |           |   |           |        |                |      |        |           |        |       |      |           |
| 7  |       |        |        |      |      |      |      |       |       |      |           |   |           |        |                |      |        |           |        |       |      |           |
| 9  |       |        |        |      |      |      |      |       |       |      |           |   |           |        |                |      |        |           |        |       |      |           |

| T6 | MEAT CONSUMP | # meat meals |   |   | Eaten at Hh or bought & eaten |          |                       | Origin this % |   |   |
|----|--------------|--------------|---|---|-------------------------------|----------|-----------------------|---------------|---|---|
|    |              | D            | B | L | # HhMem                       | # NonHhM | cedis this / other Hh | P             | G | B |
| 1  |              |              |   |   |                               |          |                       |               |   |   |
| 2  |              |              |   |   |                               |          |                       |               |   |   |
| 3  |              |              |   |   |                               |          |                       |               |   |   |
| 4  |              |              |   |   |                               |          |                       |               |   |   |

| T7 | Type of meat | # meat meals |   |   | Meat eaten outside |                       |
|----|--------------|--------------|---|---|--------------------|-----------------------|
|    |              | D            | B | L | # HhMem            | cedis this / other Hh |
| 1  |              |              |   |   |                    |                       |
| 2  |              |              |   |   |                    |                       |
| 3  |              |              |   |   |                    |                       |
| 4  |              |              |   |   |                    |                       |

**LAST NIGHT'S DINNER SURVEY – Hh & Non-Hh members consuming dinner at this house**

| T8 | Eater Name | PersID | HhMem | Eater Name | PersID | HhMem | Eater Name | PersID | HhMem | Eater Name | PersID | HhMem |
|----|------------|--------|-------|------------|--------|-------|------------|--------|-------|------------|--------|-------|
| 1  |            |        |       | 5          |        |       | 9          |        |       | 13         |        |       |
| 2  |            |        |       | 6          |        |       | 10         |        |       | 14         |        |       |
| 3  |            |        |       | 7          |        |       | 11         |        |       | 15         |        |       |
| 4  |            |        |       | 8          |        |       | 12         |        |       | 16         |        |       |

**Food consumed outside this house by Hh members**

| T9 | Eater Name | PersID | HhID | Eater Name | PersID | HhID | Eater Name | PersID | HhID | Eater Name | PersID | HhID |
|----|------------|--------|------|------------|--------|------|------------|--------|------|------------|--------|------|
| 1  |            |        |      | 5          |        |      | 8          |        |      | 11         |        |      |
| 2  |            |        |      | 6          |        |      | 9          |        |      | 12         |        |      |
| 3  |            |        |      | 7          |        |      | 10         |        |      | 13         |        |      |



Expenditures at market within last week that are not covered by 24hr recall

| 7<br>14 | Markets not last 24hr<br>Product | Income | Expend | Market ID |    |       | Food | Meal | Service | Item | Car | Market | #<br>units | unit name | Total<br>Value | Who paid<br>PersID | Who sold<br>PersID | % Purpose |      |      |      |  |
|---------|----------------------------------|--------|--------|-----------|----|-------|------|------|---------|------|-----|--------|------------|-----------|----------------|--------------------|--------------------|-----------|------|------|------|--|
|         |                                  |        |        | DW        | NS | Other |      |      |         |      |     |        |            |           |                |                    |                    | Cons      | Sale | Proc | Gift |  |
| 1       |                                  |        |        |           |    |       |      |      |         |      |     |        |            |           |                |                    |                    |           |      |      |      |  |
| 2       |                                  |        |        |           |    |       |      |      |         |      |     |        |            |           |                |                    |                    |           |      |      |      |  |
| 3       |                                  |        |        |           |    |       |      |      |         |      |     |        |            |           |                |                    |                    |           |      |      |      |  |
| 4       |                                  |        |        |           |    |       |      |      |         |      |     |        |            |           |                |                    |                    |           |      |      |      |  |
| 5       |                                  |        |        |           |    |       |      |      |         |      |     |        |            |           |                |                    |                    |           |      |      |      |  |
| 6       |                                  |        |        |           |    |       |      |      |         |      |     |        |            |           |                |                    |                    |           |      |      |      |  |
| 7       |                                  |        |        |           |    |       |      |      |         |      |     |        |            |           |                |                    |                    |           |      |      |      |  |
| 8       |                                  |        |        |           |    |       |      |      |         |      |     |        |            |           |                |                    |                    |           |      |      |      |  |
| 9       |                                  |        |        |           |    |       |      |      |         |      |     |        |            |           |                |                    |                    |           |      |      |      |  |
| 10      |                                  |        |        |           |    |       |      |      |         |      |     |        |            |           |                |                    |                    |           |      |      |      |  |
| 11      |                                  |        |        |           |    |       |      |      |         |      |     |        |            |           |                |                    |                    |           |      |      |      |  |
| 12      |                                  |        |        |           |    |       |      |      |         |      |     |        |            |           |                |                    |                    |           |      |      |      |  |
| 13      |                                  |        |        |           |    |       |      |      |         |      |     |        |            |           |                |                    |                    |           |      |      |      |  |
| 14      |                                  |        |        |           |    |       |      |      |         |      |     |        |            |           |                |                    |                    |           |      |      |      |  |

Comments:
